# Supplementary material for: Oclacitinib and Myxoma Virus Therapy in Dogs with High Grade Soft Tissue Sarcoma
Source: Preprints.org preprint supplement (doi:10.20944/preprints202307.1208.v1), 2023-07-18
Supplement: Supplementary file 1 [file Table S1.docx]

**Table S1.** Clinical data lists. A list of data collected to screen dogs for any adverse events associated with O+MYXVΔSERP2 treatment is provided. The Veterinary Comparative Oncology Group criteria were used to analyze the data collected from each patient at multiple time points during the study. No adverse events > Grade 1 were observed in patients treated pre-operatively with oclacitinib and post-operatively with MYXVΔSERP2.

| **Physical examination**  **assessments** | **Complete blood count** | **Serum biochemistry profile** | **Urinalysis** |
| --- | --- | --- | --- |
| attitude | packed cell volume | glucose | refractometer specific gravity |
| awareness | hemoglobin concentration | blood urea nitrogen | pH |
| mobility | hematocrit | creatinine | nitrite |
| hydration | red blood cell concentration | phosphorus | protein |
| body condition score | mean corpuscular volume | calcium | glucose |
| body weight | red cell distribution width | magnesium | ketones |
| temperature | mean corpuscular hemoglobin concentration | total protein | bilirubin |
| heart rate | cellular hemoglobin concentration mean | albumin | blood |
| respiratory rate | platelet concentration | globulin | color |
| pulse | mean platelet volume | albumin to globulin ratio | clarity |
| auscultation of heart, lungs & intestinal tract | total nucleated cell concentration | cholesterol | cytologic examination of the sediment |
| hair coat | neutrophil concentration | creatine kinase |  |
| oral cavity | lymphocyte concentration | total bilirubin |  |
| eyes | monocyte concentration | alkaline phosphatase |  |
| ears | eosinophil concentration | alanine aminotransferase |  |
| palpation of internal organs, anal glands & lymph nodes | basophil concentration | aspartate aminotransferase |  |
| tumor measurements | large unidentified cell concentration | gamma-glutamyl transferase |  |
|  | cytologic evaluation of a blood smear | sodium |  |
|  |  | potassium |  |
|  |  | chloride |  |
|  |  | bicarbonate |  |
|  |  | anion gap |  |
